# Supplementary material for: Neuropsychology and Electroencephalography in Rural Children at Neurodevelopmental Risk: A Scoping Review
Source: MDPI journal article supplement (doi:10.3390/pediatric15040065), 2023-12-12
Supplement: s1 [file s1]

## **Manuscript title**

### **Neuropsychology and Electroencephalography in Rural Children at Neurodevelopmental Risk: A Scoping Review**

#### Section

#### 2. Methodology

##### 2.1. Search strategy

Manual search keywords used:

("rural" AND "eeg" AND "children")

("rural" AND "risk factors" AND "children")

("neurodevelopment" AND "risk factors")

("neurodevelopment" AND "malnutrition" AND "EEG")
